# Supplementary material for: A peptide–WS2 nanosheet based biosensing platform for determination of β-secretase and screening of its inhibitors
Source: Royal Society of Chemistry journal article supplement (doi:10.1039/c8an00132d), 2018-01-01
Supplement: c8an00132d1.pdf [file c8an00132d1.pdf]

## Electronic supplementary information

### **Peptide-assembled WS<sub>2</sub> nanosheet as a A peptide-WS<sub>2</sub> nanosheet based biosensing platform for the determination of β-secretase and screening of its Inhibitors**

Xianwei Zuo,<sup>a, b, c</sup> Hongxia Dai,<sup>a, b</sup> Huige Zhang,<sup>a, b</sup> Juanjuan Liu,<sup>a, b</sup> Sudai Ma,<sup>a, b</sup>

Xingguo Chen<sup>a, b</sup> \*

<sup>a</sup> State Key Laboratory of Applied Organic Chemistry, Lanzhou University, Lanzhou  
730000, China

<sup>b</sup> Department of Chemistry, Lanzhou University, Lanzhou 730000, China

<sup>c</sup> Key Laboratory of Sensor and Sensing Technology of Gansu Province, Gansu  
Academy of Sciences, Lanzhou 730000, China

\* Corresponding author

Tel.: 86-931-8912763. Fax: 86-931-8912582. E-mail: chenxg@lzu.edu.cn

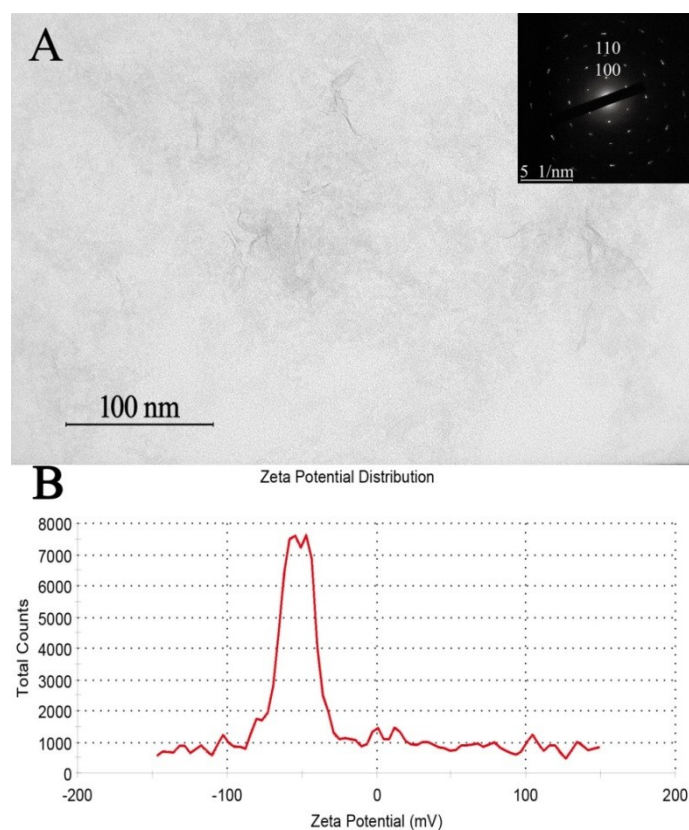

**Fig. S1** (A) TEM image of WS<sub>2</sub> nanosheet, Inset: EDS spectrum of WS<sub>2</sub> nanosheet, (B) Values of the  $\zeta$  potential for WS<sub>2</sub> nanosheet.

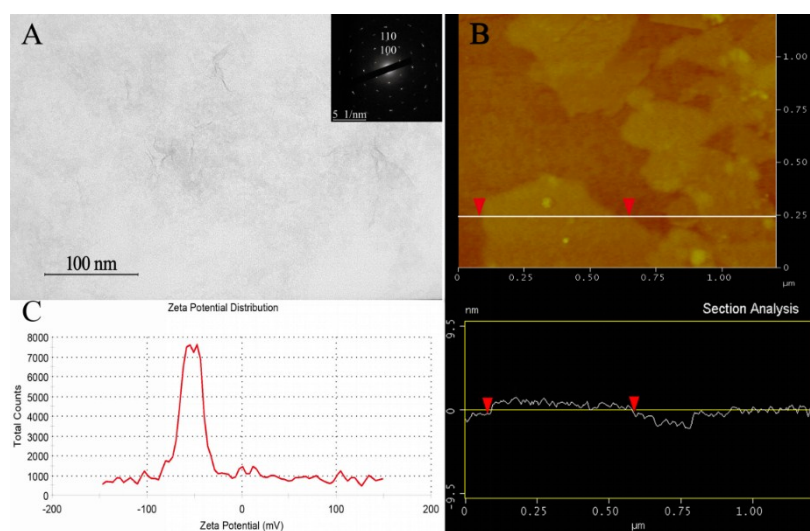

**Fig. S1** (A) TEM image of WS<sub>2</sub> nanosheet, Inset: SAED pattern of WS<sub>2</sub> nanosheet, (B) AFM image and height profile of WS<sub>2</sub> nanosheet, (C) Values of the  $\zeta$  potential for WS<sub>2</sub> nanosheet.

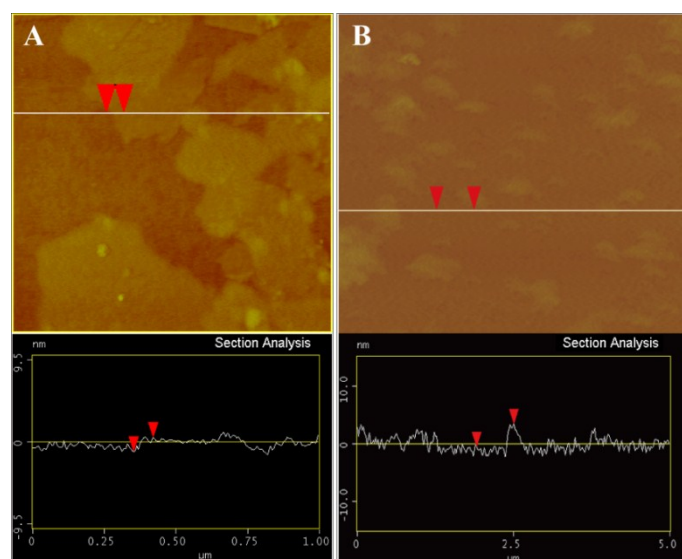

**Fig. S2** AFM image and height profile of WS<sub>2</sub> nanosheet (A) and peptide-WS<sub>2</sub> complex (B).

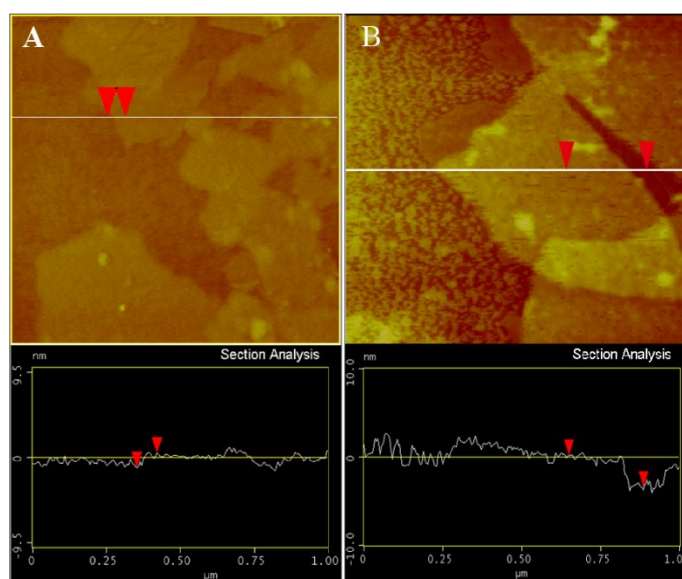

**Fig. S2** AFM image and height profile of WS<sub>2</sub> nanosheet (A) and peptide-WS<sub>2</sub> complex (B).

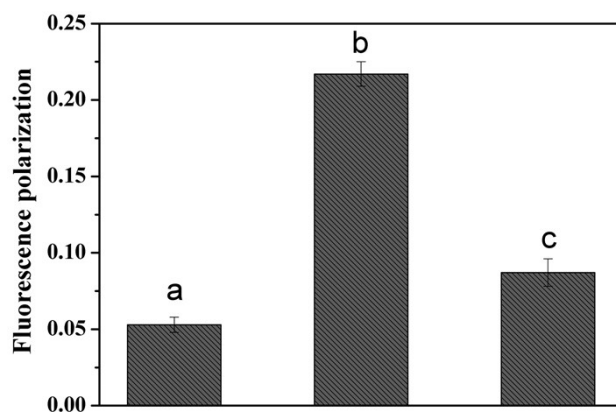

**Fig. S3** Changes of fluorescence anisotropy of (a) 50 nM FAM-peptide, (b) 50 nM FAM-peptide + 25 mg·mL<sup>-1</sup> WS<sub>2</sub> nanosheet, (c) 50 nM FAM-peptide + 25 mg·mL<sup>-1</sup> WS<sub>2</sub> nanosheet + 100 nM BACE1.

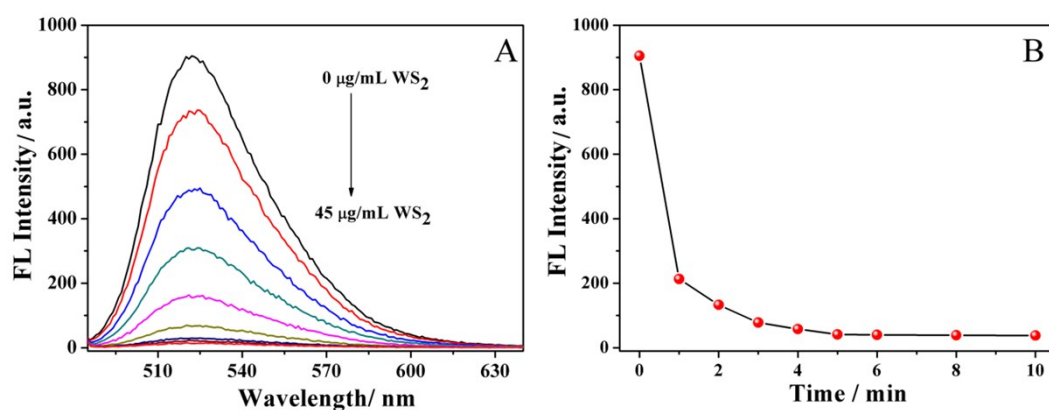

**Fig. S4** (A) Fluorescence quenching of FAM-peptide in the presence of an increasing amount of WS<sub>2</sub> nanosheet (0, 2, 5, 10, 15, 20, 25, 35, and 45 µg·mL<sup>-1</sup>). (B) Fluorescence quenching of FAM-peptide by WS<sub>2</sub> nanosheet (25 µg·mL<sup>-1</sup>) as a function of time.

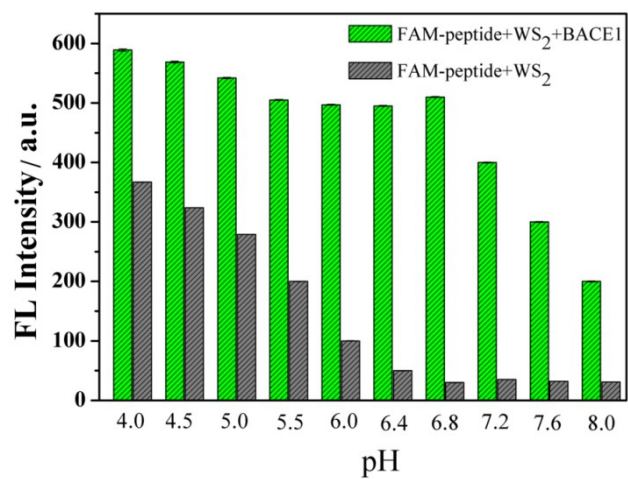

**Fig. S5** The effect of pH on fluorescence intensity.

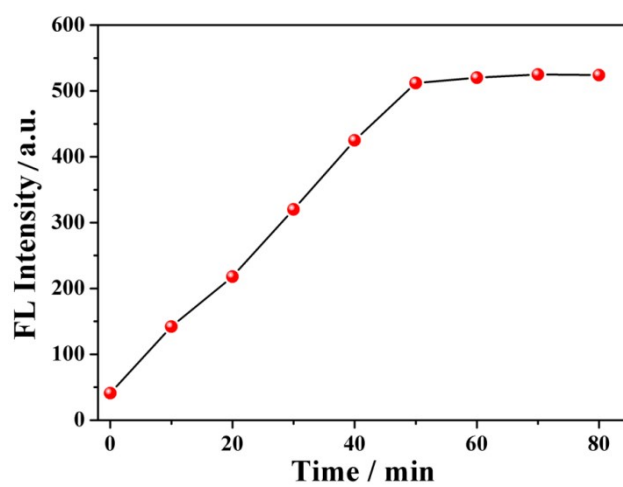

**Fig. S6** The effect of cleavage time on fluorescence intensity.

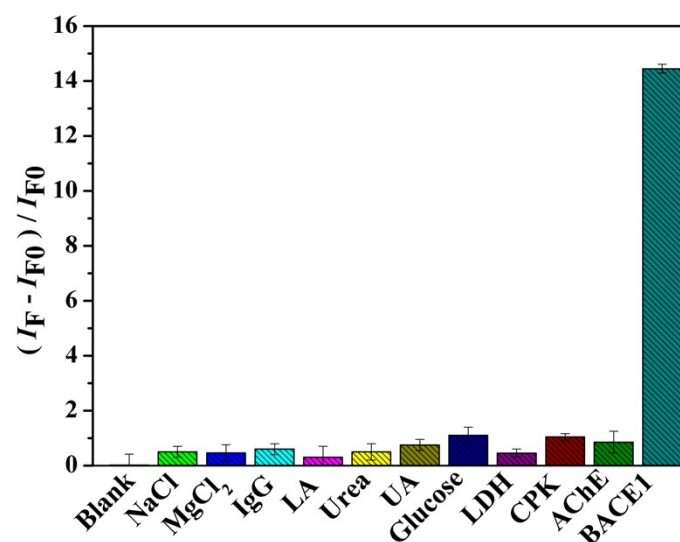

**Fig. S7** Fluorescence intensity of the WS<sub>2</sub> nanosheet-based biosensing platform in the presence of different interfering substances: Blank (without BACE1), NaCl(1 mM), MgCl<sub>2</sub>(1 mM), IgG(500 nM), LA(1 mM), urea(1 mM), UA(1 mM), glucose(1 mM), LDH(500 nM), CPK (500 nM), AChE(500 nM), and BACE1(100 nM).

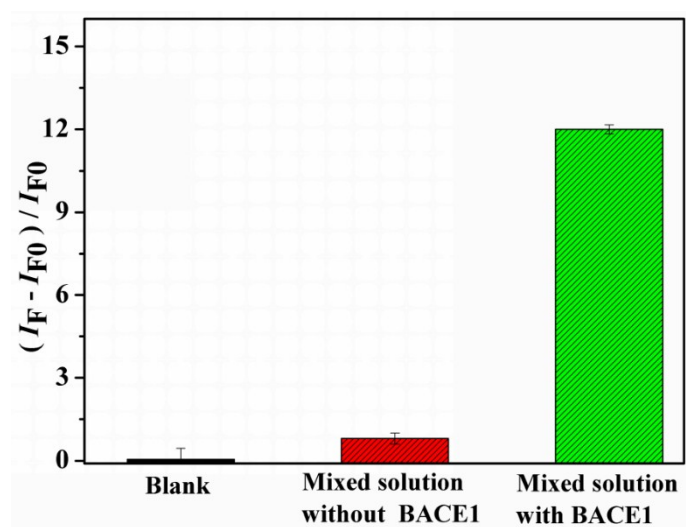

**Fig. S8** The difference in fluorescence intensity of WS<sub>2</sub> nanosheet-based biosensing platform for BACE1 under various conditions.(mixed solution including NaCl(1 mM), MgCl<sub>2</sub>(1 mM), IgG(500 nM), LA(1 mM), urea(1 mM), UA(1 mM), glucose(1 mM), LDH(500 nM), CPK (500 nM), AChE(500 nM), and BACE1(100 nM))

**Table S1** Recovery test of BACE1 in rat CSF samples

| Sample | Added | Found | Recovery | RSD      |
|--------|-------|-------|----------|----------|
| No.    | (nM)  | (nM)  | (%)      | (n=3, %) |
| 1      | 0.30  | 0.27  | 90.00    | 1.50     |
| 2      | 8.00  | 7.81  | 97.63    | 0.41     |
| 3      | 75.00 | 78.60 | 104.8    | 3.32     |

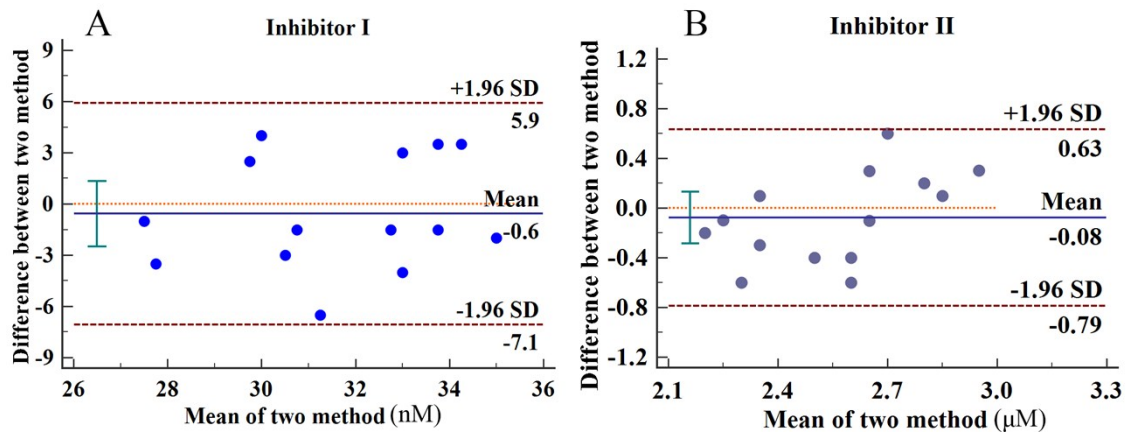

**Fig. S9** Bland-Altman plots of IC<sub>50</sub> values obtained from our proposed method and ELISA assay (A) inhibitor I, (B) inhibitor II.
